# Supplementary material
Source: PubMed Central journal article supplement (PMC7783596)
Supplement: jamaneurol-e204920-s001.pdf [file jamaneurol-e204920-s001.pdf]

## Supplementary Online Content

De Meo E, Portaccio E, Giorgio A, et al. Identifying the distinct cognitive phenotypes in multiple sclerosis. *JAMA Neurol*. Published online January 4, 2021. doi:10.1001/jamaneurol.2020.4920

**eMethods.** MRI Acquisition Protocol

**eTable 1.** Fit Indices of Latent Profile Analysis Models With 1 – 6 Profiles

**eFigure.** Latent Profile Analysis Results

**eTable 2.** Main Clinical and Demographic Features of Cognitive Phenotypes

This supplementary material has been provided by the authors to give readers additional information about their work.

## **eMethods. MRI Acquisition Protocol**

For both centers, a 3.0 Tesla Philips Intera MR scanner with 8-channel head coil (Philips Medical System, Best, The Netherlands) was used for MRI acquisition. The following MRI sequences of the brain were acquired from all subjects during a single session: a) 3DT1-weighted turbo field echo (repetition/echo time=25/4.6 ms; echo train length=1; flip angle=30°; matrix size=256x256; field-of-view=230x230mm<sup>2</sup>; 220 contiguous, axial slices with voxel size=1x1x1 mm); b) dual-echo turbo spin echo yielding proton density (PD) and T2-weighted images (repetition/echo time=2599/16.80 ms, echo train length=6; flip angle=90°, matrix size=256x256, field-of-view=240x240 mm<sup>2</sup>, 44 axial 3mm-thick slices). For all sequences, slices were positioned to run parallel to a line joining the most infero-anterior and infero-posterior margins of the corpus callosum.

**eTable 1.** Fit Indices of Latent Profile Analysis Models With 1 – 6 Profiles

| <b>Number of Classes</b> | <b>AIC</b> | <b>BIC</b> | <b>ICL</b> | <b>BLRT</b> |
|--------------------------|------------|------------|------------|-------------|
| 1                        | 23104      | 23242      | -23242     | -           |
| 2                        | 22713      | 22993      | -23382     | 0.009       |
| 3                        | 22763      | 23187      | -23893     | 0.009       |
| 4                        | 22593      | 23159      | -23768     | 0.009       |
| 5                        | 22497      | 23206      | -23903     | 0.009       |
| 6                        | 22627      | 23479      | -24227     | 0.089       |

Abbreviations: AIC = Akaike Information Criterion; BIC = Bayesian Information Criterion; ICL = Integrated Completed Likelihood, BLRT=Bootstrap Likelihood Ratio Test.

**eFigure. Latent Profile Analysis Results**

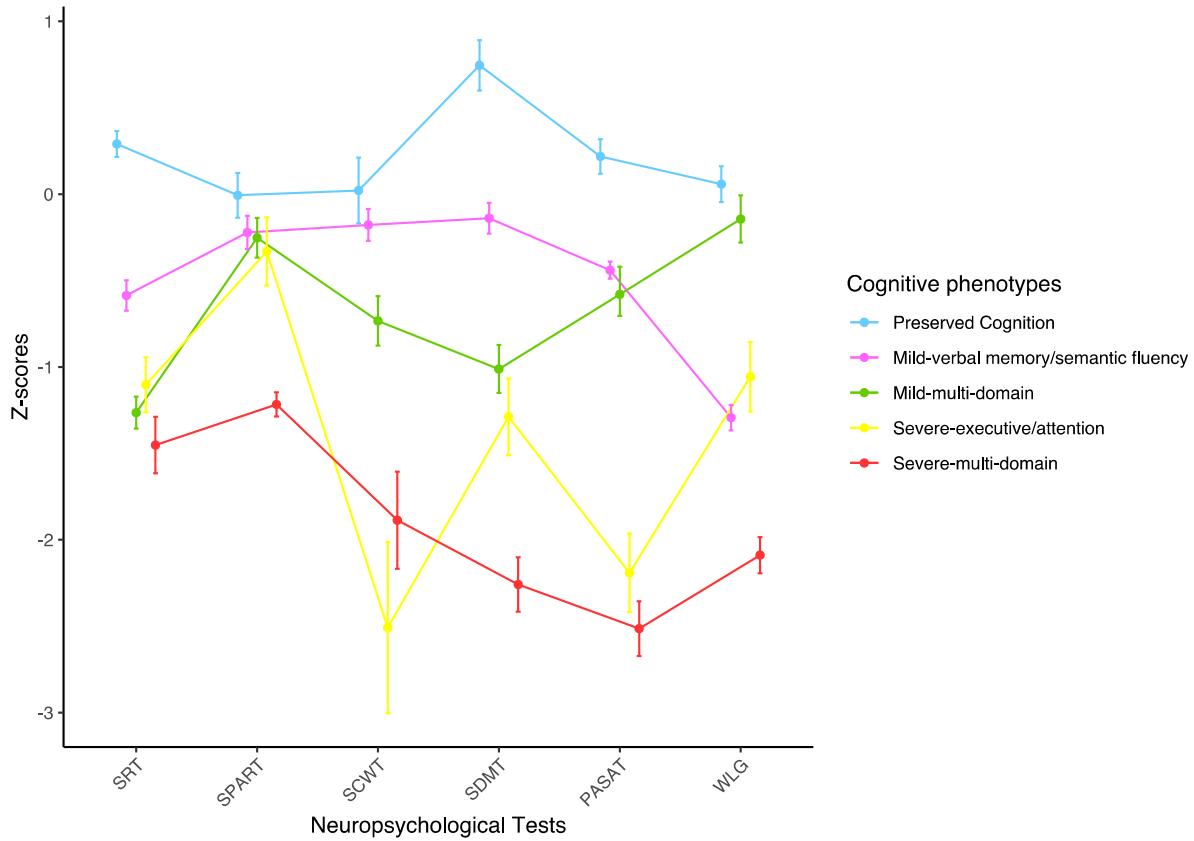

The figure represents the cognitive performance of each phenotype: points indicate mean z-scores obtained at each neuropsychological test and error bars reflect the 95% confidence interval. “Preserved cognition” phenotype is represented in cyan blue, “mild-verbal memory/semantic fluency” in purple, “mild-multi-domain” in green, “severe-attention/executive” in yellow and “severe-multi-domain” in red. Abbreviations: SRT=Selective Reminding Test; SPART=Spatial Recall Test; SCWT=Stroop Color Word Test; SDMT=Symbol Digit Modalities Test; PASAT=Paced Auditory Serial Addition Test; WLG=Word List Generation.

**eTable 2.** Main Clinical and Demographic Features of Cognitive Phenotypes

| Variables               |                                           | Mean<br>(SD)       | vs<br>Mild-verbal<br>memory/semantic<br>fluency |          | vs<br>Mild-multi-domain              |          | vs<br>Severe-executive/attention     |          | vs<br>Severe-multi-domain            |          |
|-------------------------|-------------------------------------------|--------------------|-------------------------------------------------|----------|--------------------------------------|----------|--------------------------------------|----------|--------------------------------------|----------|
|                         |                                           |                    | Effect size<br>(95% CI) <sup>a</sup>            | <i>p</i> | Effect size<br>(95% CI) <sup>a</sup> | <i>p</i> | Effect size<br>(95% CI) <sup>a</sup> | <i>p</i> | Effect size<br>(95% CI) <sup>a</sup> | <i>p</i> |
| <b>Age</b>              | Preserved<br>Cognition                    | 36.5 (9.8)         | -0.16<br>(-0.33, -0.002)                        | .98      | -0.56<br>(-0.75, -0.38)              | <.001    | -0.58<br>(-0.79, -0.37)              | <.001    | -0.72<br>(-0.91, -0.53)              | <.001    |
|                         | Mild-verbal<br>memory/semantic<br>fluency | 38.2 (11.1)        |                                                 |          | -0.38<br>(-0.55, -0.21)              | <.001    | -0.41<br>(-0.60, -0.22)              | <.001    | -0.53<br>(-0.71, -0.35)              | <.001    |
|                         | Mild-multi-domain                         | 42.6 (11.2)        |                                                 |          |                                      |          | -0.04<br>(-0.23, 0.16)               | >.99     | -0.14<br>(-0.33, 0.04)               | >.99     |
|                         | Severe-<br>executive/attention            | 42.9 (11.7)        |                                                 |          |                                      |          |                                      |          | -0.10<br>(-0.31, -0.09)              | >.99     |
|                         | Severe-multi-<br>domain                   | 44.0 (11.0)        |                                                 |          |                                      |          |                                      |          |                                      |          |
| <b>Sex</b>              |                                           | Female/male        | Effect size<br>(95% CI) <sup>b</sup>            | <i>p</i> | Effect size<br>(95% CI) <sup>b</sup> | <i>p</i> | Effect size<br>(95% CI) <sup>b</sup> | <i>p</i> | Effect size<br>(95% CI) <sup>b</sup> | <i>p</i> |
|                         | Preserved<br>Cognition                    | 155/80             | 0.01<br>(0.00, 0.08)                            | >.99     | 0.10<br>(0.00, 0.19)                 | .06      | 0.01<br>(0.00, 0.09)                 | >.99     | 0.01<br>(0.00, 0.09)                 | >.99     |
|                         | Mild-verbal<br>memory/semantic<br>fluency | 242/120            |                                                 |          | 0.11<br>(0.03, 0.19)                 | .03      | 0.00<br>(0.00, 0.04)                 | >.99     | 0.00<br>(0.00, 0.01)                 | >.99     |
|                         | Mild-multi-domain                         | 133/103            |                                                 |          |                                      |          | 0.11<br>(0.00, 0.21)                 | .05      | 0.11<br>(0.01, 0.20)                 | .04      |
|                         | Severe-<br>executive/attention            | 112/55             |                                                 |          |                                      |          |                                      |          | 0.00<br>(0.00, 0.01)                 | >.99     |
| Severe-multi-<br>domain | 142/70                                    |                    |                                                 |          |                                      |          |                                      |          |                                      |          |
| <b>EDSS</b>             |                                           | Median<br>(range)  | Effect size<br>(95% CI) <sup>c</sup>            | <i>p</i> | Effect size<br>(95% CI) <sup>c</sup> | <i>p</i> | Effect size<br>(95% CI) <sup>c</sup> | <i>p</i> | Effect size<br>(95% CI) <sup>c</sup> | <i>p</i> |
|                         | Preserved<br>Cognition                    | 1.5<br>(0.0 – 7.0) | -0.25<br>(-0.34, -0.16)                         | <.001    | -0.21<br>(-0.32, -0.11)              | <.001    | -0.17<br>(-0.29, -0.05)              | .001     | -0.39<br>(-0.49, -0.29)              | <.001    |
|                         | Mild-verbal<br>memory/semantic<br>fluency | 2.0<br>(0.0 – 7.5) |                                                 |          | -0.05<br>(-0.14, 0.05)               | >.99     | -0.02<br>(-0.14, 0.09)               | >.99     | -0.24<br>(-0.33, -0.14)              | <.001    |
|                         | Mild-multi-domain                         | 2.0<br>(0.0 – 8.0) |                                                 |          |                                      |          | 0.06<br>(-0.05, 0.18)                | >.99     | -0.14<br>(-0.25, 0.03)               | .001     |
|                         | Severe-<br>executive/attention            | 2.0<br>(0.0 – 8.0) |                                                 |          |                                      |          |                                      |          | -0.17<br>(-0.29, -0.04)              | .001     |

|                         | Severe-multi-domain                 | 3.0<br>(0.0 – 8.5) |                                      |          |                                      |          |                                      |          |                                      |          |
|-------------------------|-------------------------------------|--------------------|--------------------------------------|----------|--------------------------------------|----------|--------------------------------------|----------|--------------------------------------|----------|
| <b>Disease duration</b> |                                     | Mean<br>(SD)       | Effect size<br>(95% CI) <sup>a</sup> | <i>p</i> |
|                         | Preserved Cognition                 | 8.0 (7.3)          | -0.04<br>(-0.31, 0.24)               | >.99     | -0.56<br>(-0.84, -0.27)              | <.001    | -0.48<br>(-0.77, -0.20)              | <.001    | -0.90<br>(-0.61, -0.32)              | <.001    |
|                         | Mild-verbal memory/semantic fluency | 8.3 (7.6)          |                                      |          | -0.81<br>(-0.52, -0.23)              | <.001    | -0.73<br>(-0.45, -0.16)              | <.001    | -0.87<br>(-0.58, -0.29)              | <.001    |
|                         | Mild-multi-domain                   | 12.8 (9.6)         |                                      |          |                                      |          | 0.07<br>(-0.21, 0.35)                | .95      | -0.05<br>(-0.33, 0.22)               | .97      |
|                         | Severe-executive/attention          | 12.2 (9.5)         |                                      |          |                                      |          |                                      |          | -0.13<br>(-0.41, 0.15)               | .72      |
|                         | Severe-multi-domain                 | 13.3 (10.2)        |                                      |          |                                      |          |                                      |          |                                      |          |
| <b>Age at onset</b>     |                                     | Mean<br>(SD)       | Effect size<br>(95% CI) <sup>a</sup> | <i>p</i> |
|                         | Preserved Cognition                 | 28.6 (8.8)         | -0.14<br>(-0.41, 0.14)               | >.99     | -0.10<br>(-0.38, 0.17)               | >.99     | -0.20<br>(-0.48, 0.08)               | .50      | -0.21<br>(-0.49, 0.07)               | .21      |
|                         | Mild-verbal memory/semantic fluency | 30.0 (10.0)        |                                      |          | 0.03<br>(-0.24, 0.31)                | >.99     | -0.06<br>(-0.34, 0.22)               | >.99     | -0.08<br>(-0.35, 0.20)               | >.99     |
|                         | Mild-multi-domain                   | 29.6 (10.3)        |                                      |          |                                      |          | -0.09<br>(-0.37, 0.18)               | >.99     | -0.11<br>(-0.39, 0.17)               | >.99     |
|                         | Severe-executive/attention          | 30.6 (10.0)        |                                      |          |                                      |          |                                      |          | -0.02<br>(-0.29, 0.26)               | >.99     |
|                         | Severe-multi-domain                 | 30.7 (10.6)        |                                      |          |                                      |          |                                      |          |                                      |          |
| <b>Education</b>        |                                     | Mean<br>(SD)       | Effect size<br>(95% CI) <sup>a</sup> | <i>p</i> |
|                         | Preserved Cognition                 | 12.5 (3.4)         | 0.002<br>(-0.27, 0.28)               | >.99     | -0.16<br>(-0.44, 0.12)               | .48      | 0.14<br>(-0.14, 0.41)                | .71      | 0.05<br>(-0.23, 0.32)                | .99      |
|                         | Mild-verbal memory/semantic fluency | 12.4 (3.3)         |                                      |          | -0.16<br>(-0.44, 0.12)               | .34      | 0.13<br>(-0.14, 0.41)                | .65      | 0.04<br>(-0.23, 0.32)                | .99      |
|                         | Mild-multi-domain                   | 12.6 (3.9)         |                                      |          |                                      |          | 0.30<br>(0.02, 0.58)                 | .04      | 0.21<br>(-0.07, 0.48)                | .21      |
|                         | Severe-executive/attention          | 11.5 (4.2)         |                                      |          |                                      |          |                                      |          | -0.09<br>(-0.37, 0.19)               | .91      |
|                         | Severe-multi-domain                 | 11.8 (3.9)         |                                      |          |                                      |          |                                      |          |                                      |          |
| <b>FSS</b>              |                                     | Mean<br>(SD)       | Effect size<br>(95% CI) <sup>a</sup> | <i>p</i> |
|                         | Preserved Cognition                 | 14.2 (15.3)        | 0.18<br>(-0.10, 0.46)                | .12      | -0.17<br>(-0.45, 0.11)               | .18      | -0.48<br>(-0.76, -0.19)              | .002     | -0.08<br>(-0.36, 0.20)               | .52      |
|                         | Mild-verbal memory/semantic fluency | 11.1 (15.5)        |                                      |          | -0.35<br>(-0.63, -0.07)              | .03      | -0.66<br>(-0.95, -0.37)              | <.001    | -0.26<br>(-0.54, 0.02)               | .22      |
|                         | Mild-multi-domain                   | 17.2 (18.5)        |                                      |          |                                      |          | -0.30<br>(-0.59, 0.03)               | .05      | 0.09<br>(-0.18, 0.37)                | .50      |

|                                         |                                     |                                                                                                                                          |                                      |          |                                      |          |                                      |          |                                      |          |
|-----------------------------------------|-------------------------------------|------------------------------------------------------------------------------------------------------------------------------------------|--------------------------------------|----------|--------------------------------------|----------|--------------------------------------|----------|--------------------------------------|----------|
|                                         | Severe-executive/attention          | 22.4 (19.4)                                                                                                                              |                                      |          |                                      |          |                                      |          | 0.40<br>(0.12, 0.68)                 | .01      |
|                                         | Severe-multi-domain                 | 15.5 (18.7)                                                                                                                              |                                      |          |                                      |          |                                      |          |                                      |          |
| <b>MADRS</b>                            |                                     | Mean<br>(SD)                                                                                                                             | Effect size<br>(95% CI) <sup>a</sup> | <i>p</i> |
|                                         | Preserved Cognition                 | 7.7 (9.5)                                                                                                                                | -0.45<br>(-0.74, -0.17)              | .04      | -0.20<br>(-0.48, 0.08)               | >.99     | -0.01<br>(-0.28, 0.27)               | >.99     | -0.59<br>(-0.87, -0.30)              | .01      |
|                                         | Mild-verbal memory/semantic fluency | 11.9 (10.0)                                                                                                                              |                                      |          | 0.25<br>(-0.03, 0.53)                | >.99     | 0.44<br>(0.16, 0.73)                 | .08      | -0.13<br>(-0.41, 0.14)               | >.99     |
|                                         | Mild-multi-domain                   | 10.0 (8.9)                                                                                                                               |                                      |          |                                      |          | 0.20<br>(-0.08, 0.47)                | >.99     | -0.38<br>(-0.66, -0.10)              | .36      |
|                                         | Severe-executive/attention          | 8.3 (5.5)                                                                                                                                |                                      |          |                                      |          |                                      |          | -0.58<br>(-0.87, 0.29)               | .02      |
|                                         | Severe-multi-domain                 | 13.8 (11.0)                                                                                                                              |                                      |          |                                      |          |                                      |          |                                      |          |
| <b>Cognitive phenotype distribution</b> |                                     |                                                                                                                                          | <b>vs Late RRMS</b>                  |          | <b>vs SPMS</b>                       |          | <b>vs PPMS</b>                       |          |                                      |          |
|                                         |                                     | Preserved Cognition/<br>Mild-verbal memory/semantic fluency/<br>Mild-multi-domain/<br>Severe-executive/attention/<br>Severe-multi-domain | Effect size<br>(95% CI) <sup>b</sup> | <i>p</i> | Effect size<br>(95% CI) <sup>b</sup> | <i>p</i> | Effect size<br>(95% CI) <sup>b</sup> | <i>p</i> |                                      |          |
|                                         | Early RRMS                          | 101/149/55/44/49                                                                                                                         | 0.16<br>(0.09, 0.22)                 | <.001    | 0.37<br>(0.27, 0.45)                 | <.001    | 0.17<br>(0.04, 0.25)                 | .01      |                                      |          |
|                                         | Late RRMS                           | 125/178/146/92/114                                                                                                                       |                                      |          | 0.21<br>(0.13, 0.27)                 | <.001    | 0.11<br>(0.00, 0.16)                 | .09      |                                      |          |
|                                         | SPMS                                | 5/15/26/20/37                                                                                                                            |                                      |          |                                      |          | 0.27<br>(0.03, 0.40)                 | .02      |                                      |          |
|                                         | PPMS                                | 4/20/9/11/12                                                                                                                             |                                      |          |                                      |          |                                      |          |                                      |          |

<sup>a</sup> Cohen's d effect size

<sup>b</sup> Cramer's V effect size

<sup>c</sup> Cliff's delta effect size

Abbreviations: EDSS=Expanded Disability Status Scale; SD=standard deviation; FSS=Fatigue Severity Scale; MADRS=Montgomery Asberg Depression Rating Scale.
